# Supplementary material for: Combined photodynamic-chemotherapy investigation of cancer cells using carbon quantum dot-based drug carrier system
Source: Drug Deliv. 2020 May 18;27(1):791–804. doi: 10.1080/10717544.2020.1765431 (PMC7301704; doi:10.1080/10717544.2020.1765431)
Supplement: Supplemental Material [file IDRD_A_1765431_SM1120.docx]

**Supplementary information**

**Combined Photodynamic-Chemotherapy investigation of Cancer Cells using Carbon Quantum Dot-Based Drug Carrier System**

**Xin Lia, Kandasamy Vinothinibc, Mariappan Rajanc*, Andy Ramub***

aDepartment of Medical Oncology, Xinxiang Central Hospital,The Fourth Clinical College of Xinxiang Medical College, Xinxiang City,Henan Province, 453000, China

bDepartment of Inorganic chemistry, School of Chemistry, Madurai Kamaraj University, Madurai 625021, Tamil Nadu, India.

c*Biomaterials in Medicinal Chemistry Laboratory, Department of Natural Products Chemistry, School of Chemistry, Madurai Kamaraj University, Madurai 625021,Tamil Nadu, India.

***Corresponding author**

Mariappan Rajan, Biomaterials in Medicinal Chemistry Laboratory, Department of Natural Products Chemistry, School of Chemistry, Madurai Kamaraj University, Madurai - 625021, India. Tel: +91 9488014084; Fax: 0452-2459845; Email: [rajanm153@gmail.com](mailto:rajanm153@gmail.com).

**1. Carbon quantum dots methodology**

***
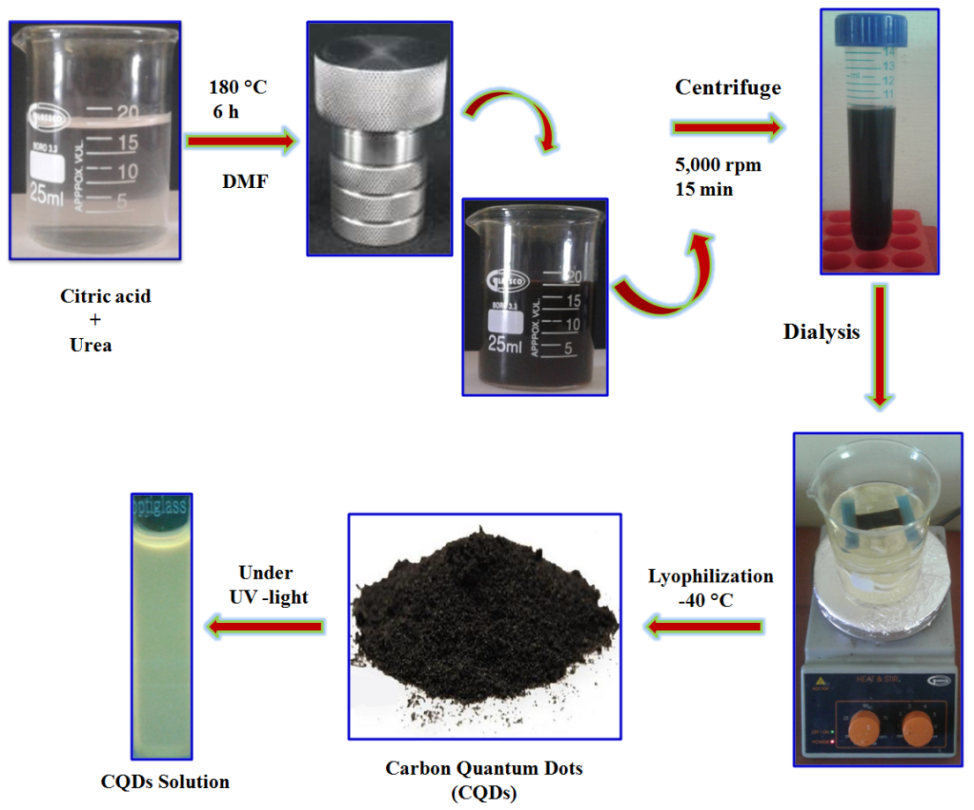
***

**S.Figure 1.** Synthetic representation of carbon quantum dot (CQD) preparation

**2. UV-Visible, Fluorescence and Raman spectroscopy**

***
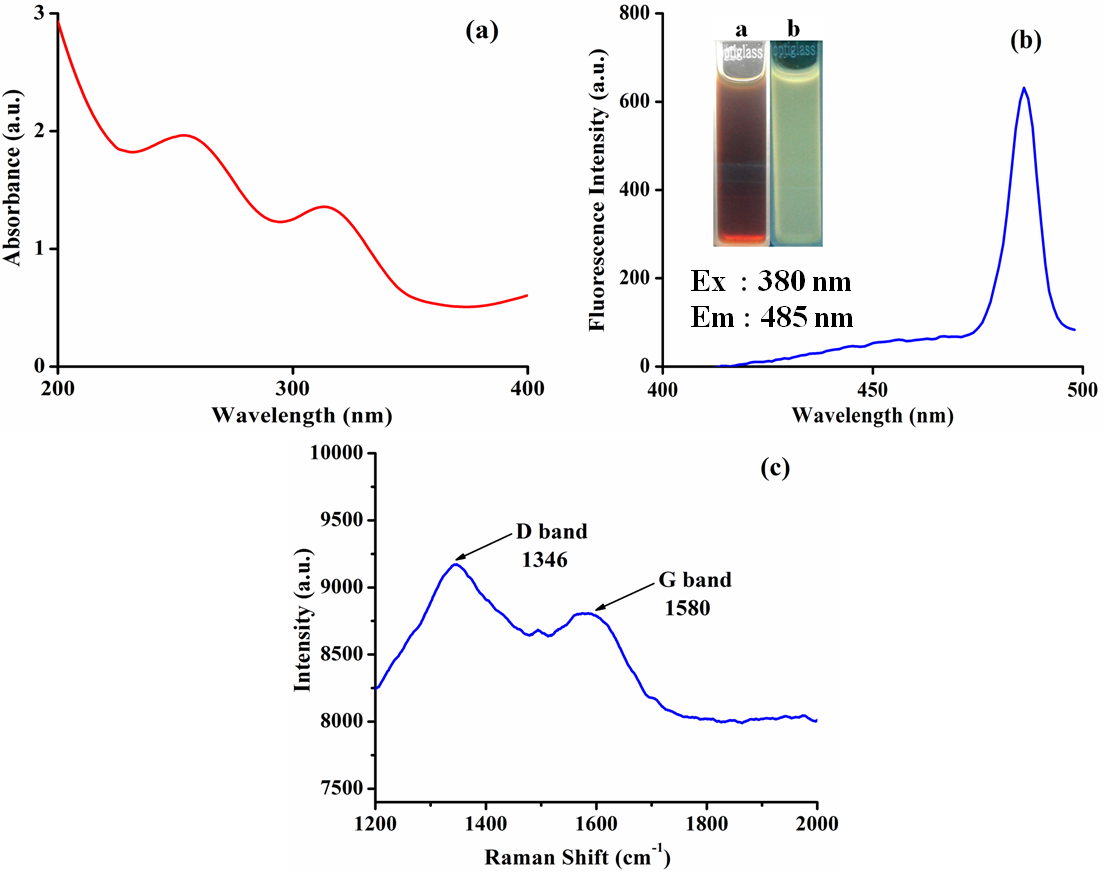
***

**S.Figure 2.**Carbon quantum dot spectrum of (a) UV-Visible spectroscopy (b) Fluorescence spectrum and (c) Raman Spectrum

**3. *In-vitro* cell cytotoxicity**


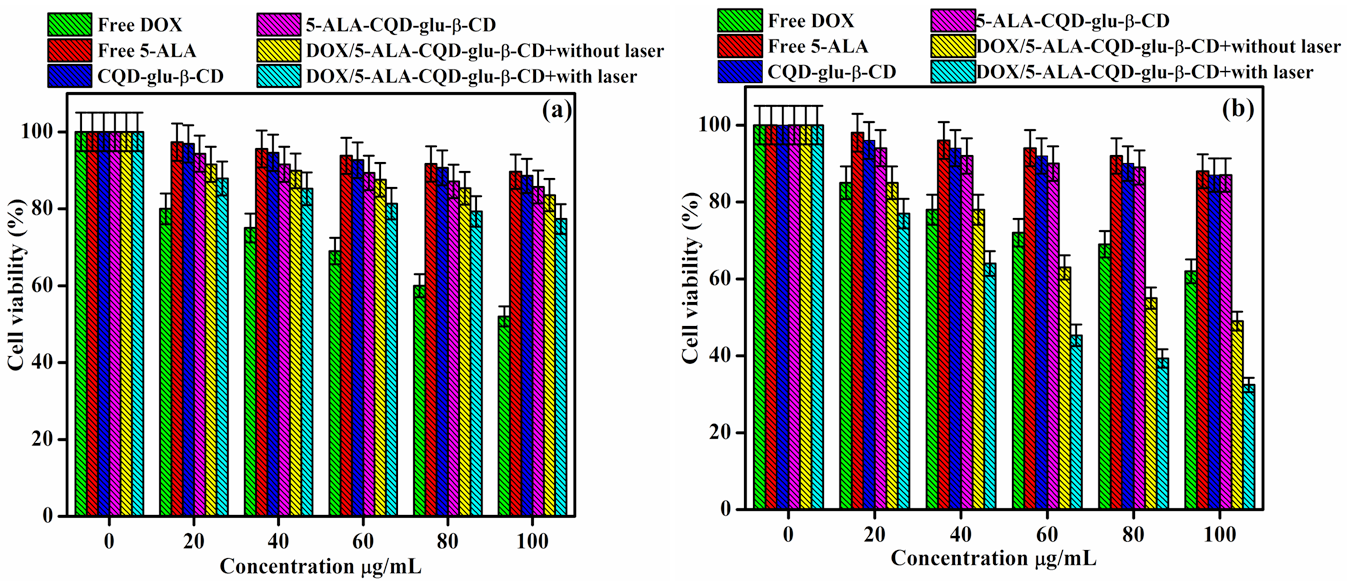


**S.Figure 3 (a&b).** *In-vitro* cytotoxic effect of fibroblast (WS-1) cell line and breast cancer (MCF-7) cell line in 24 h incubation with Free DOX, Free 5-ALA, CQD-Glu-β-CD, 5-ALA-CQD-Glu-β-CD and DOX/5-ALA-CQD-Glu-β-CD in without and with laser treatment at different concentration manner such as 0, 20, 40, 60, 80 and 100 μg/mL.
